# Supplementary material
Source: publisher figshare collection journal article supplement (https://springernature.figshare.com/ndownloader/files/21530598)
Supplement: Supplementary file [file 21530598]

# ***ANESTHESIOLOGISTS***

**GROUP A** - experts without feedback: this group allowed the extraction of the threshold values

**COMPARISON A-B** - made between GROUP A and GROUP B to answer the question "**Is the use of the skill trainer efficient for the retraining of experienced personnel?**"

**GROUP B** - experts with sound and visual feedback: this group allowed to highlight the usefulness of feedback in the refinement of the intubation technique

**COMPARISON B-C** - made between GROUP B and GROUP C to answer the question "**Does the support of the physician increase or not the improvement in the execution of the procedure?**"

**GROUP C** - experts with feedback and medical support: this group allowed to highlight the effect caused by the support of the expert doctor

# ***PEDIATRICIANS***

**GRUPPO A1** - experts  
without feedback: this group  
allowed the extraction of the  
threshold values

**COMPARISON A1-B1** - made between GROUP A1 and GROUP B1 to answer the question “**Is the use of the skill trainer efficient for the retraining of experienced personnel?**”

**GROUP B1** - experts with  
sound and visual  
feedback: this group allowed  
to highlight the usefulness of  
feedback in the refinement  
of the intubation technique

**COMPARISON B1-C1** - made between GROUP B1 and GROUP C1 to answer the question “**Does the support of the physician increase or not the improvement in the execution of the procedure?**”

**GROUP C1** - experts with  
feedback and medical  
support: this group allowed  
to highlight the effect caused  
by the support of the expert  
doctor

# ***ANESTHESIOLOGISTS vs PEDIATRICIANS***

**GROUP A – anesthesiologists**  
without feedback: this group  
allowed the extraction of the  
threshold values

**COMPARISON A-A1** - made between GROUP  
A and GROUP A1 to assess whether  
anesthesiologists and pediatricians perform  
the intubation maneuver in a different way

**GRUPPO A1 - pediatricians**  
without feedback: this group  
allowed the extraction of the  
threshold values
